# Supplementary material for: Characterization of a Novel Amphiphilic Cationic Chlorin Photosensitizer for Photodynamic Applications
Source: MDPI journal article supplement (doi:10.3390/ijms24010345), 2022-12-25
Supplement: s1 [file s1]

# Characterization of a novel amphiphilic cationic chlorin photosensitizer for photodynamic applications

Margarita A. Gradova, Oleg V. Gradov, Anton V. Lobanov, Anna V. Bychkova, Elena D. Nikolskaya, Nikita G. Yabbarov, Mariia R. Mollaeva, Anton E. Egorov, Alexey A. Kostyukov, Vladimir A. Kuzmin, Irina S. Khudyaeva, Dmitry V. Belykh

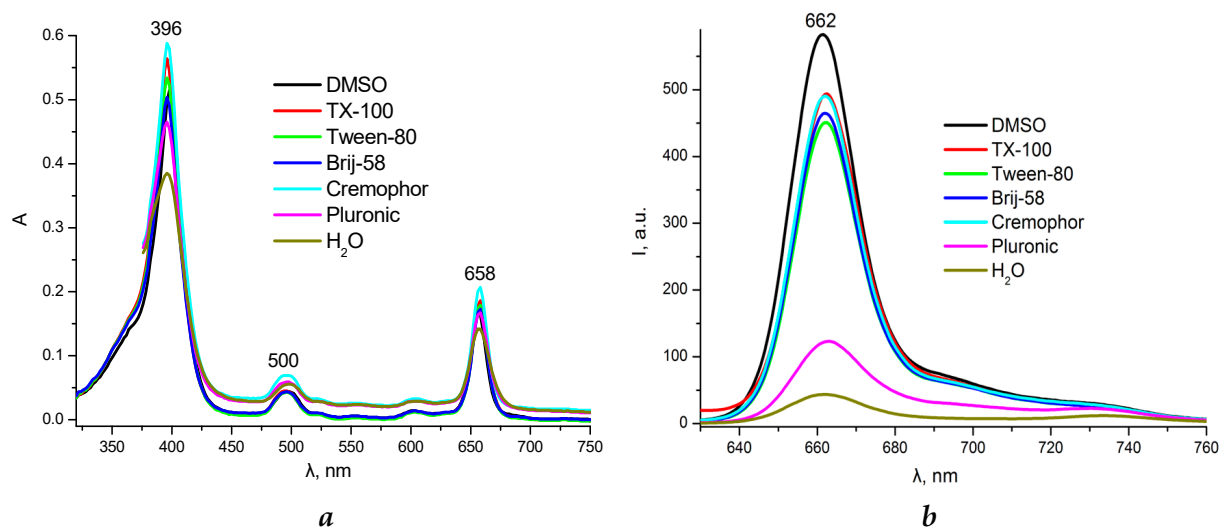

**Figure S1.** UV-Vis absorption (a) and fluorescence (b) spectra of 1 in DMSO, H<sub>2</sub>O and nonionic surfactant solutions.

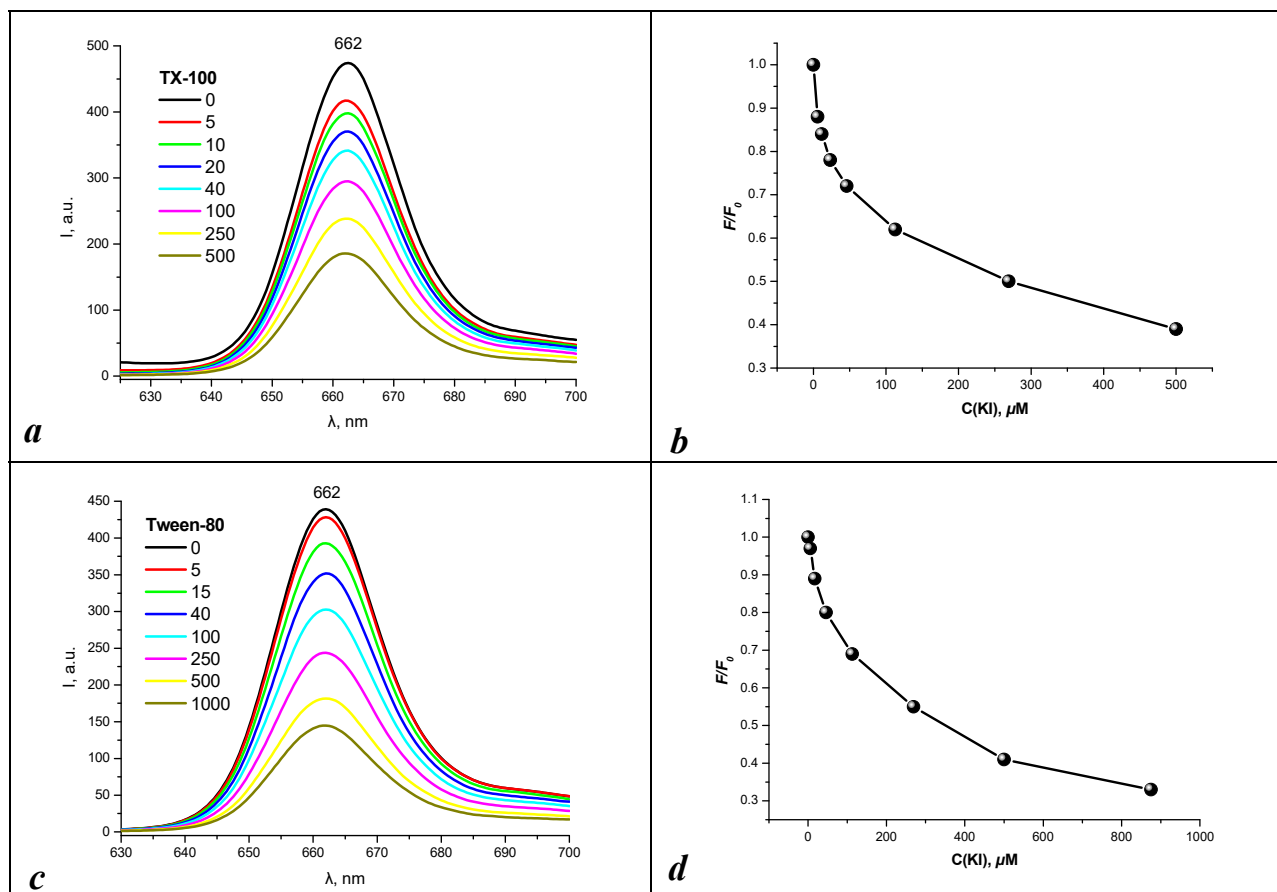

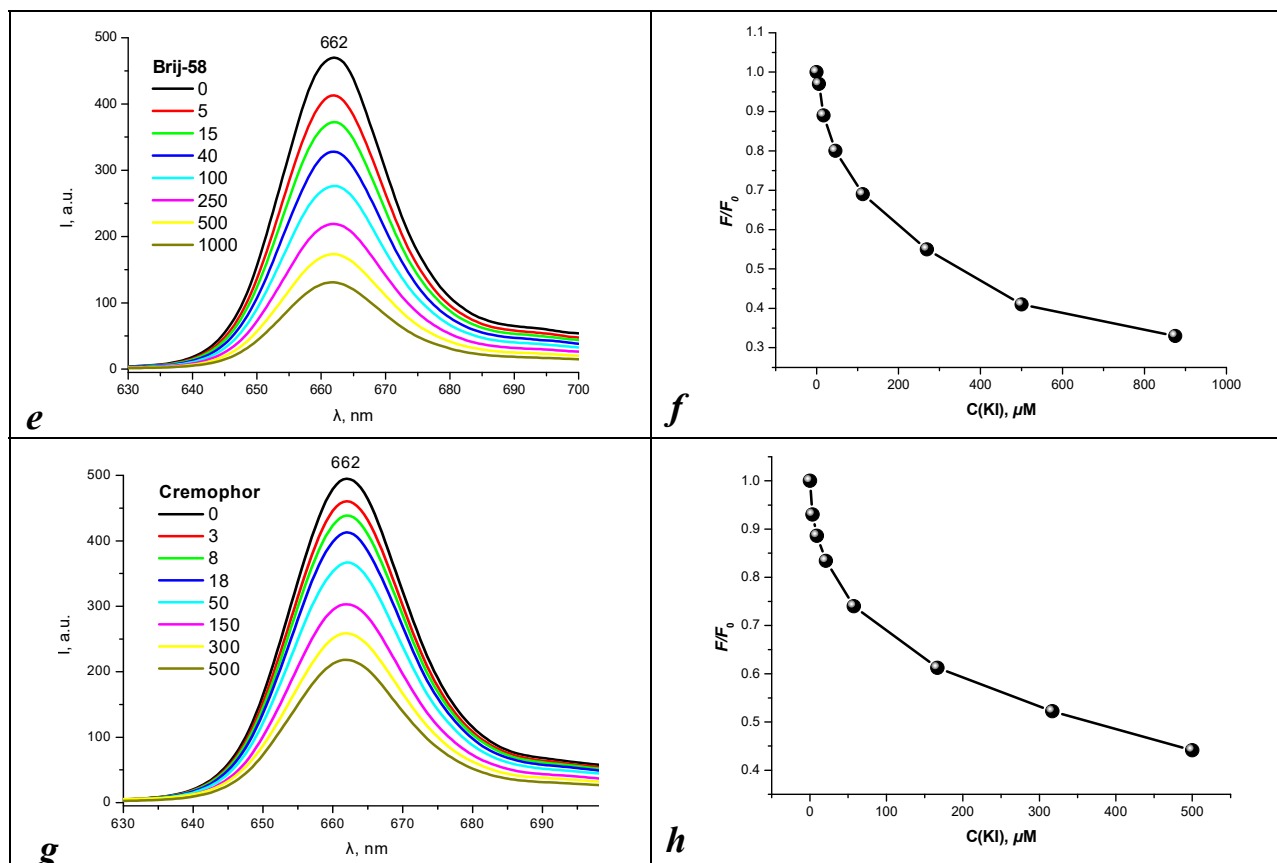

**Figure S2.** Fluorescence spectra of **1** in nonionic surfactant micelles (*a,c,e,g*) upon titration with KI and the corresponding  $\text{I}^-$  ion concentration-dependent fluorescence decay curves (*b,d,f,h*).

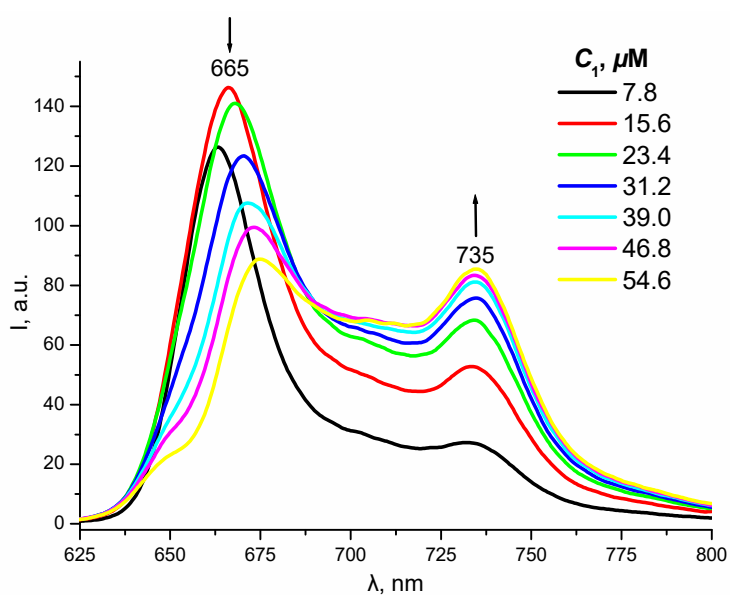

**Figure S3.** Concentration dependence of the fluorescence spectra of **1** in  $\text{H}_2\text{O}$  with 0.3-2% DMSO.

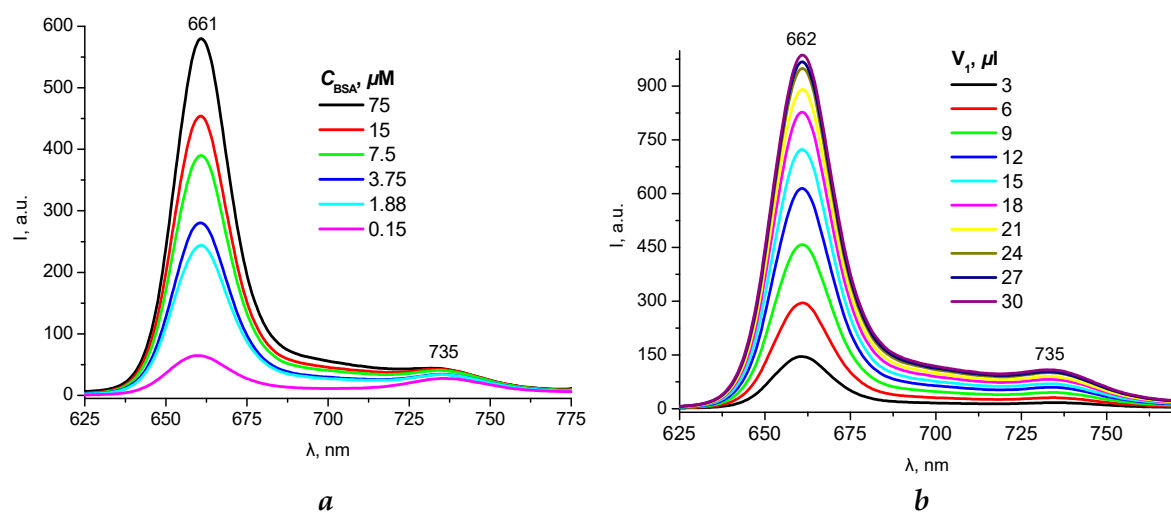

**Figure S4.** Fluorescence spectra of **1** in BSA at different  $C_{BSA}$  (**a**) and different  $C_1$  (**b**).
